# Supplementary material for: Trends in osteopathic medical education: a scoping review
Source: publisher site journal article supplement (doi:10.1515/jom-2024-0051), 2025-02-11
Supplement: Supplementary file 1 [file j_jom-2024-0051_suppl_001.docx]

Appendix 1
Search Strategy

Database: MEDLINE (PubMed)

Search conducted on May 7, 2021.

Limits: Publication years 2010-2020

| Search # | Query |
| --- | --- |
| #1 | "osteopath*"[tiab] OR "osteopathic physicians"[MeSH Terms] OR "osteopathic medicine"[MeSH Terms] |
| #2 | accredit*[tiab] OR educat*[tiab] OR evaluat*[tiab] OR instruct*[tiab] OR “Interprofessional Relations”[tiab] OR matricula*[tiab] OR "training"[tiab] OR teach*[tiab] OR learn*[tiab] OR "Patient Care"[tiab] OR school*[tiab] OR student*[tiab] OR facult*[tiab] OR “health personnel”[tiab] OR mentor*[tiab] OR preceptor*[tiab] OR resident*[tiab] OR staff*[tiab] OR "Accreditation"[Mesh] OR "Education"[Mesh] OR "Teaching"[Mesh] OR "Learning"[Mesh] OR "Patient Care"[Mesh] OR "Students"[Mesh] OR “Faculty”[Mesh] OR “Health Personnel”[Mesh] |
| #3 | #1 AND #2 AND (2010:2020[pdat]) |

Database: CINAHL (EBSCO)

Search conducted on August 13, 2021

Limits: Date

| Search # | Query |
| --- | --- |
| #1 | Faculty OR Health personnel OR Teachers OR Students OR Mentorship OR Osteopaths OR Preceptorship OR Physicians OR Interns & residents OR Staff OR Student doctors OR Teacher |
| #2 | Accreditation OR Clinical competence OR Competency-based education OR Curriculum OR Education OR Instruction OR Interdisciplinary communication OR interprofessional relations OR Education, Interdisciplinary OR Learning OR Near-peer teaching OR Patient care OR Pre-matriculation program OR Problem-based learning OR Program evaluation OR Service learning OR Computer Simulation OR Teaching |
| #3 | Clinical clerkship OR Computer-assisted instruction OR Education, Non-traditional OR Undergraduate medical education OR Graduate medical education OR Education, premedical OR Interns and residents OR Manipulation, osteopathic OR Education, Medical OR Schools, medical OR Web-based learning OR Osteopathy OR Osteopathic medicine OR Osteopathic medical school |
| #4 | #1 AND #2 AND Limit 2010-2020 |

Database: Education Research Complete (EBSCO)

Search conducted on July 28, 2021

Limits:Publication years 2010-2020

| Search # | Query |
| --- | --- |
| #1 | TI ( osteopath* or "osteopathic physician" or "osteopathic medicine" ) OR AB ( osteopath* or "osteopathic physician" or "osteopathic medicine" ) |
| #2 | TI ( accredit* OR educat* OR evaluat* OR instruct* OR “Interprofessional Relations” OR matricula* OR train* OR teach* OR learn* OR "Patient Care" OR school* OR student* OR facult* OR “health personnel” OR mentor* OR preceptor* OR resident* OR staff* ) OR AB ( accredit* OR educat* OR evaluat* OR instruct* OR “Interprofessional Relations” OR matricula* OR train* OR teach* OR learn* OR "Patient Care" OR school* OR student* OR facult* OR “health personnel” OR mentor* OR preceptor* OR resident* OR staff* ) OR DE Education exploded |
| #3 | #1 AND #2 (filter by date range for 2010-2020) |

Database: Embase (Elsevier)

Search conducted on July 21, 2021

Limits: Publication year 2010-2020, English language filter

| Search # | Query |
| --- | --- |
| #1 | 'osteopathic medicine'/exp OR 'osteopathic physician'/exp OR osteopath*:ti,ab |
| #2 | 'accreditation'/exp OR 'medical education'/exp OR 'education'/exp OR 'teaching'/exp OR 'learning'/exp OR 'patient care'/exp OR 'student'/exp OR 'medical students'/exp OR 'medical school'/exp OR 'university'/exp OR 'health care personnel'/exp OR accredit*:ti,ab OR educat*:ti,ab OR evaluat*:ti,ab OR instruct*:ti,ab OR 'interprofessional relations':ti,ab OR matricula*:ti,ab OR train*:ti,ab OR teach*:ti,ab OR learn*:ti,ab OR 'patient care':ti,ab OR school*:ti,ab OR student*:ti,ab OR facult*:ti,ab OR 'health personnel':ti,ab OR mentor*:ti,ab OR preceptor*:ti,ab OR resident*:ti,ab OR staff*:ti,ab |
| #3 | #1 AND #2 |
| #4 | #3 AND Date filter |
| #5 | #4 AND English filter |

Database: OSTMED (Edward Via College of Osteopathic Medicine and VTLS, Inc.)

Search conducted on August 11, 2021

Limits: Publication year 2010-2020

| Search # | Query |
| --- | --- |
| #1 | (Accreditation OR Competenc* OR Curriculum OR Education OR Instruction OR Learning OR Teaching OR Evaluation OR Training) |
| #2 | #1 AND date |

Database: ERIC (Ovid)

Search conducted on July 26, 2021

Limits: Publication year 2010-2020

| Search # | Query |
| --- | --- |
| #1 | (osteopath* or "osteopathic physician" or "osteopathic medicine").mp |
| #2 | exp "Accreditation (Institutions)"/ or exp Education/ or exp Learning/ or exp Students/ or exp Faculty/ or exp Health Personnel/ or (accredit* or educat* or evaluat* or instruct* or matricula* or train* or teach* or learn* or "Patient Care" or school* or student* or facult* or mentor* or preceptor* or resident* or staff* or "health personnel" or "interprofessional relations").mp |
| #3 | #1 AND #2 (filter by date range for 2010-2020) |

Database: MEDLINE (Ovid)

Search Conducted: July 27, 2021

Limits: Publication years 2010-2020

| Search # | Query |
| --- | --- |
| #1 | osteopath*.ti,ab. |
| #2 | exp osteopathic physicians/ or exp osteopathic medicine/ |
| #3 | 1 or 2 |
| #4 | (accredit* or educat* or evaluat* or instruct* or interprofessional relation* or matricula* or training or teach* or learn* or patient care or school* or student* or facult* or health personnel or mentor* or preceptor* or resident* or staff*).ti,ab. |
| #5 | exp accreditation/ or exp education/ or exp teaching/ or exp learning/ or exp patient care/ or exp students/ or exp faculty/ or exp health personnel/ |
| #6 | 4 or 5 |
| #7 | 3 and 6 |
| #8 | limit 7 to yr="2010 - 2020" |

Database: Scopus (Elsevier)

Search conducted on July 26, 2021

Limits: Publication year 2010-2020, English language

| Search # | Query |
| --- | --- |
| #1 | ( TITLE-ABS-KEY ( "osetopath*" OR "osteopathic physician*" OR {osteopathic medicine} ) |
| #2 | TITLE-ABS-KEY ( {Accreditation} OR {Clinical Competence} OR {Competency-Based Education} OR {Curriculum} OR {Education} OR {Instruction} OR {Interdisciplinary Communication} OR {Interprofessional Relations} OR {Interprofessional Education} OR {Learning} OR {Near-Peer Teaching} OR {Patient Care} OR {Pre-matriculation Program} OR {Problem-Based Learning} OR {Program Evaluation} OR {Service Learning} OR {Simulation Training} OR {Teaching} ) |
| #3 | TITLE-ABS-KEY ( {Clinical Clerkship} OR {Computer-Assisted Instruction} OR {Distance Education} OR {undergraduate medical education} OR {graduate medical education} OR {premedical education} OR {Internship and Residency} OR "Osteopathic manipulation" OR {Medical Education} OR {Premedical Education} OR "medical school*" OR ( "Web-based Learning" AND ( "Osteopathic" OR "Osteopathic Medicine" ) ) OR {Osteopathic Medical School} ) ) |
| #4 | #1 AND #2 AND #3 |
| #5 | #4 AND ( LIMIT-TO ( PUBYEAR , 2020 ) OR LIMIT-TO ( PUBYEAR , 2019 ) OR LIMIT-TO ( PUBYEAR , 2018 ) OR LIMIT-TO ( PUBYEAR , 2017 ) OR LIMIT-TO ( PUBYEAR , 2016 ) OR LIMIT-TO ( PUBYEAR , 2015 ) OR LIMIT-TO ( PUBYEAR , 2014 ) OR LIMIT-TO ( PUBYEAR , 2013 ) OR LIMIT-TO ( PUBYEAR , 2012 ) OR LIMIT-TO ( PUBYEAR , 2011 ) OR LIMIT-TO ( PUBYEAR , 2010 ) ) |
| #6 | #5 AND ( LIMIT-TO ( LANGUAGE , "English" ) ) |

Database: Google Scholar (Alphabet Inc.)

Search conducted on August 11, 2021

Limits: Publication year 2010-2020

| Search # | Query |
| --- | --- |
| #1 | (Osteopathic) AND (Accreditation OR Education OR Curriculum OR Instruction OR Teaching OR Learning) |

Database: MedNar (Deep Web Technologies)

Search conducted on August 16, 2021

Limits: Publication year 2010-2020

| Search # | Query |
| --- | --- |
| #1 | Osteopathic medical education |
